# Supplementary material for: Endothelial dysfunction induces atherosclerosis: increased aggrecan expression promotes apoptosis in vascular smooth muscle cells
Source: PubMed Central journal article supplement — BMB Rep. 2019 Feb 28;52(2):145–50. doi: 10.5483/BMBRep.2019.52.2.282 (PMC6443320; doi:10.5483/bmbrep.2019.52.2.282), 2019-02-28
Supplement: bmb-52-145-supple.pdf [file bmb-52-145-supple.pdf]

Supplementary Table 1. Genes upregulated in aortic tissue of *eNOS*<sup>-/-</sup>

| Functional Gene Grouping | Gene symbol      | Full name                                                                | Biological function                                   | <sup>†</sup> Fold changes |
|--------------------------|------------------|--------------------------------------------------------------------------|-------------------------------------------------------|---------------------------|
| Atherosclerosis          | <i>CTGF</i>      | connective tissue growth factor                                          | Adhesion, extracellular molecules, cell growth        | +2.13                     |
|                          | <i>FNI</i>       | fibronectin 1                                                            | Response to stress, adhesion, extracellular molecules | +1.91                     |
|                          | <i>THBS4</i>     | thrombospondin 4                                                         | Adhesion, extracellular molecules                     | +1.98                     |
| Apoptosis                | <i>TNFRSF11b</i> | tumor necrosis factor receptor superfamily, member 11b (osteoprotegerin) | DEATH domain proteins                                 | +2.13                     |
|                          | <i>DAPK1</i>     | death associated protein kinase 1                                        | Induction of apoptosis, DEATH domain proteins         | +1.70                     |

<sup>†</sup>+: increase.
